# Supplementary material
Source: PubMed Central journal article supplement (PMC3993910)
Supplement: pr401075f_si_001.pdf [file pr401075f_si_001.pdf]

CITRATE CYCLE (TCA CYCLE)

Fig S1. Kegg pathway of the TCA cycle showing proteins down-regulated (red rectangles).

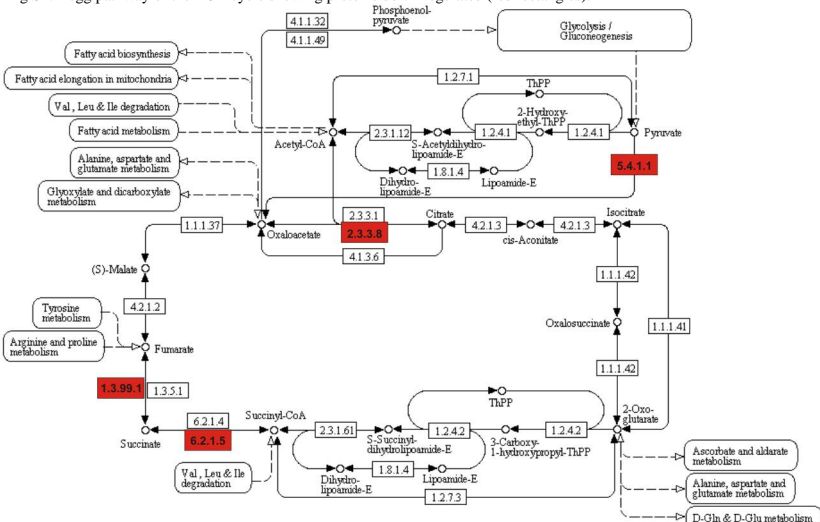

**GLYCOLYSIS / GLUCONEOGENESIS**

Fig S2. Kegg pathway of the glycolysis/gluconeogenesis showing proteins down-regulated (red rectangles).

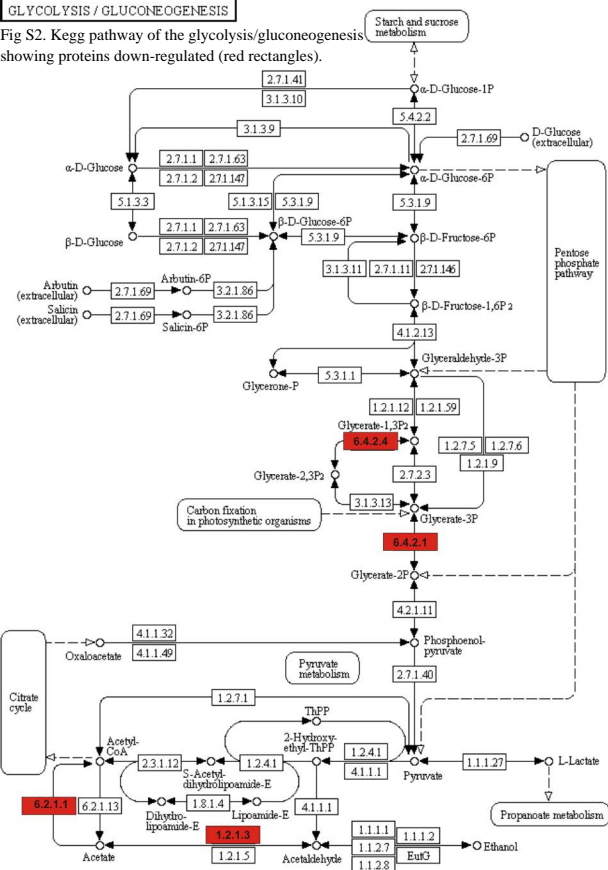

# PYRUVATE METABOLISM

Fig S3. Kegg pathway of the pyruvate metabolism showing proteins down-regulated (red rectangles) or up-regulated (green rectangles).

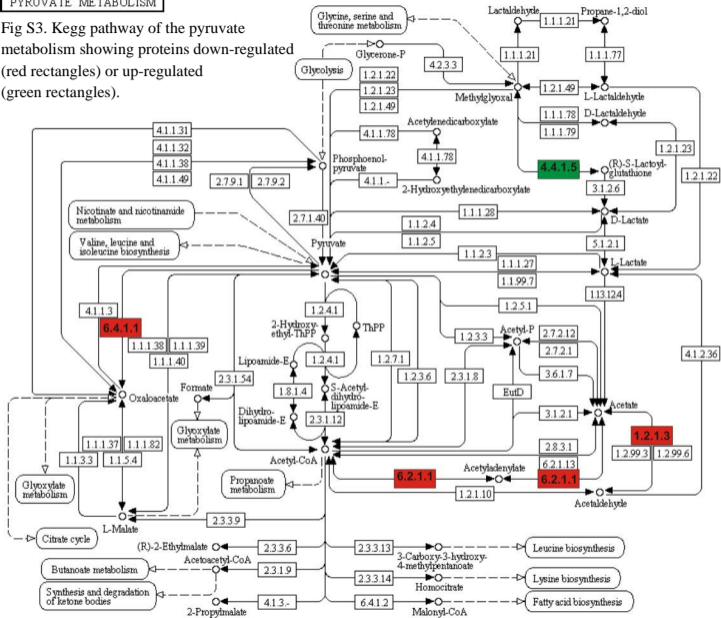

**ALANINE, ASPARTATE AND GLUTAMATE METABOLISM**

Fig S4. Kegg pathway of the alanine, aspartate and glutamate metabolism showing proteins up-regulated (green rectangles).

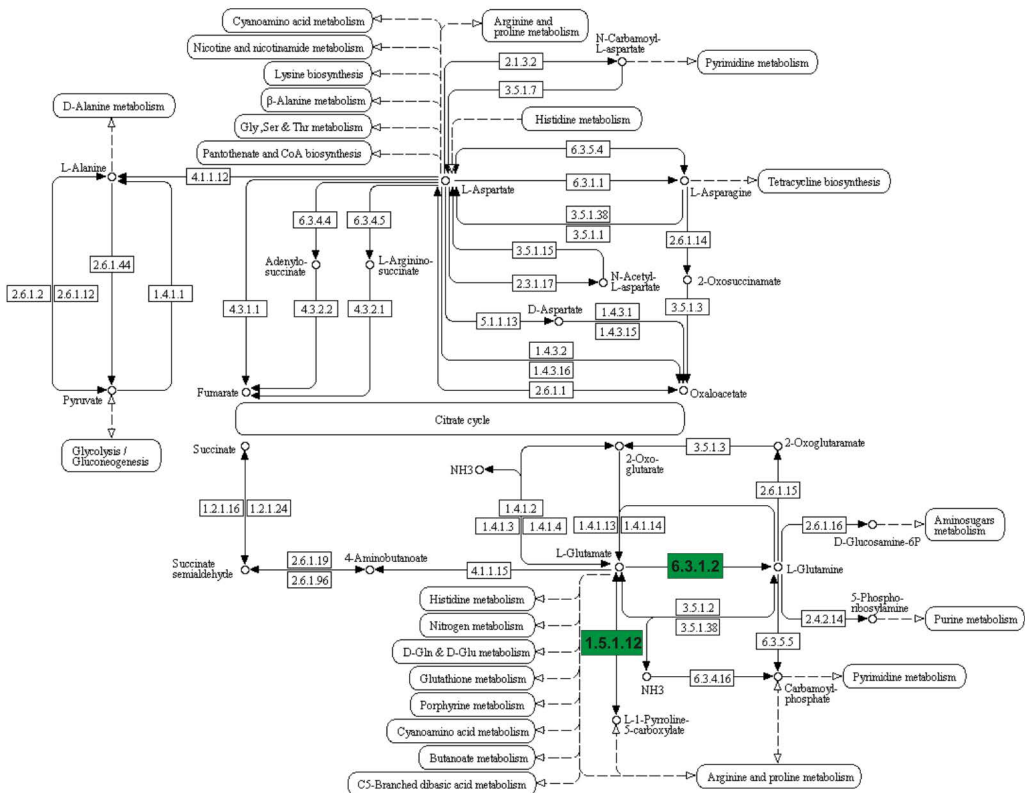

GLUTATHIONE METABOLISM

Fig S5. Kegg pathway of the glutathione metabolism showing proteins up-regulated (green rectangles).

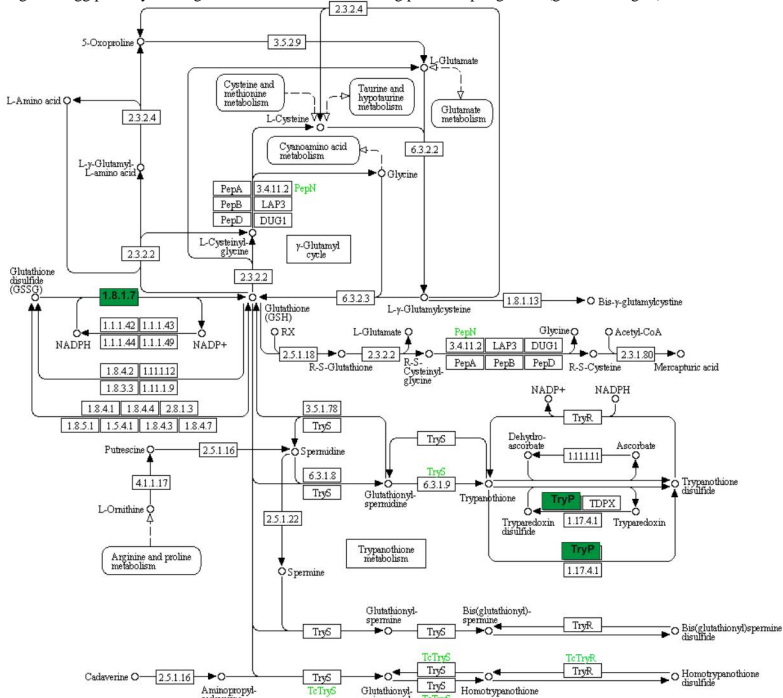

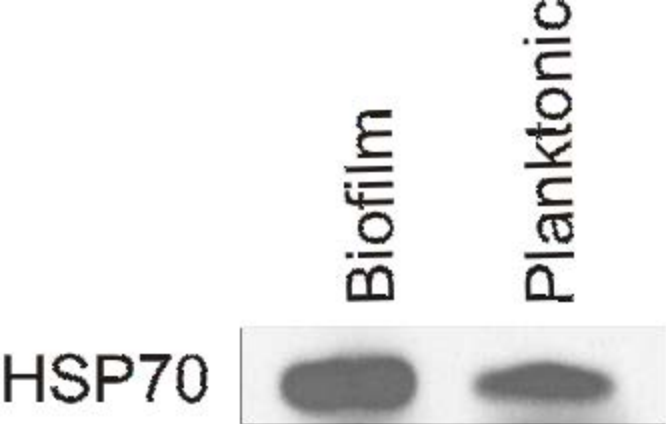

Fig S6. Immunoblot of *Cryptococcus neoformans* biofilm and planktonic cells using monoclonal anti-mouse HSP70 antisera.
